# Supplementary material for: Potential Targets and Mechanisms of Jiedu Quyu Ziyin Decoction for Treating SLE-GIOP: Based on Network Pharmacology and Molecular Docking
Source: J Immunol Res. 2023 Mar 28;2023:8942415. doi: 10.1155/2023/8942415 (PMC10072964; doi:10.1155/2023/8942415)
Supplement: Supplementary Materials — All the potential pharmacologically active ingredients of JP. [file 8942415.f1.xlsx]

## Sheet: Sheet1
Herb name	Molecule ID	Molecule name	OB(%)	DL
Radix Rehmanniae Glutinosae（Sheng Di Huang,SDH）	MOL012254	campesterol	37.58	0.71
	MOL000493	campesterol	37.58	0.71
	MOL005438	campesterol	37.58	0.71
Carapax Amydae Sinensis(Cu Bie Jia,CBJ)	MOL000953	vitamin d	37.87	0.68
Rhizomn Cimicifugae(Sheng Ma,SM)	MOL011991	23-epi-26-deoxyactein_qt	47.64	0.35
	MOL011999	24-epi-acerinol	31.31	0.42
	MOL012011	25-o-acetylcimigenol-3-o-beta-d-glc(1-2)beta-d-xylopyranoside_qt	30.04	0.32
	MOL012023	7,8-didehydrocimigenol	36.79	0.4
	MOL012040	Norkhelloside	31.31	0.84
	MOL012052	Tuberosine A	102.67	0.34
	MOL012053	cimicifugic acid	83.02	0.45
	MOL012055	cimicifugoside_qt	33.84	0.74
	MOL012062	cimigenol	37.19	0.4
	MOL012073	methylcimicifugoside_qt	30.19	0.24
	MOL012078	visamminol	50.01	0.23
	MOL012081	(20r,24r)-24,25-epoxy-3-beta-(beta-d-xylopyranosyloxy)-9,19-cyclolanost-7-ene-16,23-dione_qt	40.1	0.76
	MOL001924	paeoniflorin	53.87	0.79
	MOL001925	paeoniflorin_qt	68.18	0.4
	MOL000359	sitosterol	36.91	0.75
	MOL000449	Stigmasterol	43.83	0.76
	MOL000483	(Z)-3-(4-hydroxy-3-methoxy-phenyl)-N-[2-(4-hydroxyphenyl)ethyl]acrylamide	118.35	0.26
Herba Oldenlandiae Diffusae(Bai Hua She She Cao,BHSSC)	MOL001646	2,3-dimethoxy-6-methyanthraquinone	34.86	0.26
	MOL001659	Poriferasterol	43.83	0.76
	MOL001663	(4aS,6aR,6aS,6bR,8aR,10R,12aR,14bS)-10-hydroxy-2,2,6a,6b,9,9,12a-heptamethyl-1,3,4,5,6,6a,7,8,8a,10,11,12,13,14b-tetradecahydropicene-4a-carboxylic acid	32.03	0.76
	MOL001670	2-methoxy-3-methyl-9,10-anthraquinone	37.83	0.21
	MOL000449	Stigmasterol	43.83	0.76
	MOL000358	beta-sitosterol	36.91	0.75
	MOL000098	quercetin	46.43	0.28
Herba Artemisiae Apiaceae(Qing Hao,QH)	MOL002235	EUPATIN	50.8	0.41
	MOL000354	isorhamnetin	49.6	0.31
	MOL000359	sitosterol	36.91	0.75
	MOL004083	Tamarixetin	32.86	0.31
	MOL004112	Patuletin	53.11	0.34
	MOL000422	kaempferol	41.88	0.24
	MOL000449	Stigmasterol	43.83	0.76
	MOL004609	Areapillin	48.96	0.41
	MOL005229	Artemetin	49.55	0.48
	MOL000006	luteolin	36.16	0.25
	MOL007274	Skrofulein	30.35	0.3
	MOL007389	artemisitene	54.36	0.31
	MOL007400	vicenin-2_qt	45.84	0.21
	MOL007401	Cirsiliol	43.46	0.34
	MOL007404	vitexin_qt	52.18	0.21
	MOL007412	DMQT	42.6	0.37
	MOL007415	[(2S)-2-[[(2S)-2-(benzoylamino)-3-phenylpropanoyl]amino]-3-phenylpropyl] acetate	58.02	0.52
	MOL007423	6,8-di-c-glucosylapigenin_qt	59.85	0.21
	MOL007424	artemisinin	49.88	0.31
	MOL007425	dihydroartemisinin	50.75	0.3
	MOL007426	deoxyartemisinin	54.47	0.26
	MOL000098	quercetin	46.43	0.28
Centellae Herba(Ji Xue Cao,JXC)	MOL000098	quercetin	46.43	0.28
	MOL000359	sitosterol	36.91	0.75
	MOL007326	Cynarin(e)	31.76	0.68
Radix Paeoniae Rubra(Chi Shao,CS)	MOL001002	ellagic acid	43.06	0.43
	MOL001918	paeoniflorgenone	87.59	0.37
	MOL001921	Lactiflorin	49.12	0.8
	MOL001924	paeoniflorin	53.87	0.79
	MOL001925	paeoniflorin_qt	68.18	0.4
	MOL002714	baicalein	33.52	0.21
	MOL002776	Baicalin	40.12	0.75
	MOL000358	beta-sitosterol	36.91	0.75
	MOL000359	sitosterol	36.91	0.75
	MOL004355	Spinasterol	42.98	0.76
	MOL000449	Stigmasterol	43.83	0.76
	MOL000492	(+)-catechin	54.83	0.24
	MOL006990	(1S,2S,4R)-trans-2-hydroxy-1,8-cineole-B-D-glucopyranoside	30.25	0.27
	MOL006992	(2R,3R)-4-methoxyl-distylin	59.98	0.3
	MOL006994	1-o-beta-d-glucopyranosyl-8-o-benzoylpaeonisuffrone_qt	36.01	0.3
	MOL001002	ellagic acid	43.06	0.43
	MOL001918	paeoniflorgenone	87.59	0.37
	MOL001921	Lactiflorin	49.12	0.8
	MOL001924	paeoniflorin	53.87	0.79
	MOL001925	paeoniflorin_qt	68.18	0.4
	MOL002714	baicalein	33.52	0.21
	MOL002776	Baicalin	40.12	0.75
	MOL000358	beta-sitosterol	36.91	0.75
	MOL000359	sitosterol	36.91	0.75
	MOL004355	Spinasterol	42.98	0.76
	MOL000449	Stigmasterol	43.83	0.76
	MOL000492	(+)-catechin	54.83	0.24
	MOL006990	(1S,2S,4R)-trans-2-hydroxy-1,8-cineole-B-D-glucopyranoside	30.25	0.27
	MOL006992	(2R,3R)-4-methoxyl-distylin	59.98	0.3
	MOL006994	1-o-beta-d-glucopyranosyl-8-o-benzoylpaeonisuffrone_qt	36.01	0.3
Semen Coicis Lachryma-jobi(Yi Yi Ren,YYR)	MOL001323	Sitosterol alpha1	43.28	0.78
	MOL001494	Mandenol	42	0.19
	MOL002372	(6Z,10E,14E,18E)-2,6,10,15,19,23-hexamethyltetracosa-2,6,10,14,18,22-hexaene	33.55	0.42
	MOL002882	[(2R)-2,3-dihydroxypropyl] (Z)-octadec-9-enoate	34.13	0.3
	MOL000359	sitosterol	36.91	0.75
	MOL000449	Stigmasterol	43.83	0.76
	MOL008118	Coixenolide	32.4	0.43
	MOL008121	2-Monoolein	34.23	0.29
	MOL000953	CLR	37.87	0.68
Fructus Citri Sarcodactylis(Fo Shou,FS)	MOL001323	Sitosterol alpha1	43.28	0.78
	MOL013253	5,2',5'-Trihydroxy-6,7,8-trimethoxyflavone	37.49	0.43
	MOL001506	Supraene	33.55	0.42
	MOL002881	Diosmetin	31.14	0.27
	MOL002917	5,2',6'-Trihydroxy-7,8-dimethoxyflavone	45.05	0.33
Radix Glycyrrhizae Uralensis(Gan Cao,GC)	MOL001484	Inermine	75.18	0.54
	MOL002311	Glycyrol	90.78	0.67
	MOL004808	glyasperin B	65.22	0.44
	MOL004810	glyasperin F	75.84	0.54
	MOL004824	(2S)-6-(2,4-dihydroxyphenyl)-2-(2-hydroxypropan-2-yl)-4-methoxy-2,3-dihydrofuro[3,2-g]chromen-7-one	60.25	0.63
	MOL004855	Licoricone	63.58	0.47
	MOL004863	3-(3,4-dihydroxyphenyl)-5,7-dihydroxy-8-(3-methylbut-2-enyl)chromone	66.37	0.41
	MOL004891	shinpterocarpin	80.3	0.73
	MOL004903	liquiritin	65.69	0.74
	MOL004904	licopyranocoumarin	80.36	0.65
	MOL004914	1,3-dihydroxy-8,9-dimethoxy-6-benzofurano[3,2-c]chromenone	62.9	0.53
	MOL004959	1-Methoxyphaseollidin	69.98	0.64
	MOL005000	Gancaonin G	60.44	0.39
	MOL005007	Glyasperins M	72.67	0.59
	MOL005017	Phaseol	78.77	0.58
